1 **Title: Social environment drives sex and age-specific variation in *Drosophila***  
2 ***melanogaster* microbiome composition and predicted function.**

3

4 **Authors:** Thomas Leech<sup>1</sup>§, Laurin McDowall<sup>1</sup>§, Kevin P Hopkins<sup>2</sup>, Steven M Sait<sup>1</sup>, Xavier A.  
5 Harrison <sup>2,3</sup>and Amanda Bretman<sup>1</sup>

6

7 **Author Affiliations**

8 <sup>1</sup>School of Biology, Faculty of Biological Sciences, University of Leeds, Leeds, LS2 9JT, UK

9 <sup>2</sup>Institute of Zoology, Zoological Society of London, Regent's Park, London, NW1 4RY, UK

10 <sup>3</sup>Centre for Ecology & Conservation, University of Exeter, Penryn, TR10 9FE

11 § These authors contributed equally

12

13 **ORCID:** TL, 0000-0002-9504-0739; LM, 0000-0001-8425-5702; KPH, 0000-0002-3251-  
14 7093; SMS, 0000-0002-7208-8617; XAH 0000-0002-2004-3601; AB, 0000-0002-4421-3337

15

16 **Corresponding authors:**

17 Amanda Bretman, School of Biology, Faculty of Biological Sciences, University of Leeds,  
18 Leeds, LS2 9JT, UK

19 [a.j.bretman@leeds.ac.uk](mailto:a.j.bretman@leeds.ac.uk)

20 Xavier A. Harrison, Centre for Ecology & Conservation, University of Exeter, Penryn, TR10  
21 9FE

22 [x.harrison@exeter.ac.uk](mailto:x.harrison@exeter.ac.uk)

23

24 **Key Words:** microbiota-gut-brain axis, infection, ageing, development, stress

## 25 **Abstract**

26 Social environments influence multiple traits of individuals including immunity, stress and  
27 ageing, often in sex-specific ways. The composition of the microbiome (the assemblage of  
28 symbiotic microorganisms within a host) is determined by environmental factors and the  
29 host's immune, endocrine and neural systems. The social environment could alter host  
30 microbiomes extrinsically by affecting transmission between individuals, likely promoting  
31 homogeneity in the microbiome of social partners. Alternatively, intrinsic effects arising from  
32 interactions between the microbiome and host physiology (the microbiota-gut-brain axis)  
33 could translate social stress into dysbiotic microbiomes, with consequences for host health.  
34 We investigated how manipulating social environments during larval and adult life-stages  
35 altered the microbiome composition of *Drosophila melanogaster* fruit flies. We used social  
36 contexts that particularly alter the development and lifespan of males, predicting that any  
37 intrinsic social effects on the microbiome would therefore be sex-specific. The presence of  
38 adult males during the larval stage significantly altered the microbiome of pupae of both  
39 sexes. In adults, same-sex grouping increased bacterial diversity in both sexes. Importantly,  
40 the microbiome community structure of males was more sensitive to social contact at older  
41 ages, an effect partially mitigated by housing focal males with young rather than co-aged  
42 groups. Functional analyses suggest that these microbiome changes impact ageing and  
43 immune responses. This is consistent with the hypothesis that the substantial effects of the  
44 social environment on individual health are mediated through intrinsic effects on the  
45 microbiome, and provides a model for understanding the mechanistic basis of the  
46 microbiota-gut-brain axis.

47

48

## 49 **Significance statement**

50 The social environment has pervasive, multifaceted effects on individual health and fitness. If  
51 a host's microbiome is sensitive to the social environment then it could be an important  
52 mediator of social effects, as the reciprocal relationships between hosts and their  
53 microbiomes have substantial implications for host health. Using a *Drosophila melanogaster*  
54 fruit fly model we show that the fly microbiome is sensitive to the social environment in a sex,  
55 age and life-stage dependent manner. In particular, older adult male microbiome  
56 communities are altered by same-sex social contact, but this depends on the age of the  
57 social partners. These changes have functional effects on fly immunity and lifespan,  
58 evidence that indeed this is an influential mediator of social effects on health.

## 59 Introduction

60 Social environments have multiple effects on individual health, including immune responses  
61 (1, 2), ageing and ultimately lifespan (3-5). Indeed meta-analyses show that adverse social  
62 environments are a health risk factor on a par with obesity and smoking (6). Effects of social  
63 environments are complex. They are seen in animals not usually thought of as social, there  
64 are marked sex differences, and hence what constitutes a stressful social environment is not  
65 straightforward (1, 4, 5). For example, periods of social isolation can be beneficial even in  
66 gregarious species (7). The mechanisms that translate information about the social  
67 environment into these effects are unclear, but it has been suggested that the microbiome  
68 (the community of microorganisms living symbiotically with a host) plays a role (5). Social  
69 impacts on microbiomes are expected given that close contact aids horizontal transmission  
70 of microbes (8, 9) and social partners will often have similar diets, a key driver of microbiome  
71 composition (10). Such extrinsic processes would lead to greater homogeneity in the  
72 microbiome of social partners, but would not necessarily have any fitness consequences for  
73 the host. However, there is a great deal of interaction between the microbiome and host  
74 immune pathways, hormones and neurotransmitters known as the 'microbiota-gut-brain axis'  
75 (11). Therefore host social environments that impact stress and immune responses (1, 2, 12)  
76 could indirectly alter the microbiome. This could have profound consequences for host  
77 health given the microbiomes influence on development and behaviour (13), susceptibility to  
78 pathogens (14), ageing (15, 16) and fitness trade-offs (17). Therefore, social stress that  
79 drives dysbiosis could mediate the effects of social environments on lifespan.

80 So far the influence of host social interactions on microbiome composition has been  
81 investigated exclusively in mammals. Similarities in microbiomes driven by cohabitation,  
82 social group membership or social networks seen in ring-tailed lemurs (*Lemur catta*) (18),  
83 wild baboons (*Simia hamadryas*) (19) and humans (20) likely represent extrinsic effects of  
84 social environments. In mice, social stress alters gut immune gene expression and their gut  
85 microbial community (21). Moreover, fecal transfers from mice stressed through isolation  
86 recapitulates isolation behaviours in non-isolated mice (22). These studies in mice are  
87 suggestive of intrinsic mechanisms connecting host social environments and the  
88 microbiome. To broaden our understanding of these effects, we used an invertebrate model  
89 system in which simple experimental manipulations of social contact alter ageing and  
90 lifespan.

91 Work in *Drosophila melanogaster* fruit flies has demonstrated multiple effects of  
92 social environments on individual behaviour and physiology. We chose to focus on social  
93 conditions to which males are particularly sensitive, therefore extrinsic effects of the social

94 environment should affect both sexes equally but intrinsic effects would be seen to a greater  
95 extent in males. In adults, same-sex social contact has sex-specific impacts on actuarial and  
96 functional senescence (4, 5). Male lifespan is reduced disproportionately by the presence of  
97 same-sex cohabitants, especially when given an immune challenge (4), but both sexes can  
98 survive longer post-infection with certain bacteria if held with same-sex partners (1). Males  
99 use the presence of other males as a cue of potential sperm competition, making  
100 sophisticated adjustments to their reproductive behaviour and ejaculate (23, 24). During  
101 development, larval density can alter growth rates and adult body size, and the prior  
102 presence of adults on food substrates can increase larval survival (25). In addition, when  
103 food resources are not limiting, both higher density and the presence of adult males (cues of  
104 future sperm competition) stimulate males to develop larger accessory glands (26), and  
105 males raised at lower density are better at learning when adult (27). The fly microbiome  
106 affects a range of traits including development (28), metabolism (29), immune responses  
107 (30) and longevity (16). The fly microbiome is relatively simple (31) and its composition  
108 changes across life stages and ages (32). Differences in microbiome community are driven  
109 by the environment, for example wild-caught versus laboratory rearing, or maintenance on  
110 different food sources (33). Larvae gain gut microbes through ingestion of their egg casing  
111 and from their food, and this environmental replenishment continues during adulthood (30),  
112 so extrinsic effects of the social environment are likely. Additionally, fly gene expression is  
113 socially sensitive, including immune, stress and lifespan related genes (1, 12), so there is  
114 potential for intrinsic effects of social environments acting through the microbiota-gut-brain  
115 axis.

116 We captured the bacterial component of the microbiome using 16S sequencing, but  
117 for brevity hereafter refer to this as the microbiome. We examined the effect of larval rearing  
118 density or presence of adult males, conditions that alter development (25-27), on the  
119 microbiome of pupae and one day old adults. As the *D. melanogaster* microbiome is  
120 dependent on regular replenishment from ingesting bacteria from the environment,  
121 potentially from excreta from other flies (30), we expected that larvae developing in high  
122 densities or kept with adults would show greater species richness and changes in  
123 microbiome composition. In adults we compared socially isolated flies to those kept in co-  
124 aged same sex groups, conditions that alters lifespan in a sex-specific manner (4, 5). In  
125 addition, we investigated the effect of the age of the cohabitants by housing an ageing focal  
126 fly with a group of consistently young flies, as the effect of social contact on ageing in males  
127 can be altered by the age of the partner flies (34). In light of our findings, and because of the  
128 importance of microbiomes in combatting infections (30), we tested the ability of adult flies to  
129 survive an oral infection.

## 130 Results and discussion

### 131 The presence of adults during development alters the microbiome of pupae

132 We measured this at the end of development when flies could be sexed, before and  
133 after metamorphosis (pupae and 1 day old adults). In pupae, being raised in the presence of  
134 adults increased species richness measured as alpha diversity (effect of adult presence  $F_{1,77} = 4.648$ ,  $p = 0.034$ ; effect of life stage  $F_{1,78} = 31.39$ ,  $p < 0.001$ ; Figure 1A). There was no  
135 effect of sex (Table S1). This is echoed in community structure (beta diversity) where we  
136 detected an interaction life stage and adult presence (PERMANOVA  $F_{1,79} = 7.20$ ,  $p <$   
137  $0.001$ ). Distinct separation occurred in the bacterial communities of adult presence and  
138 absence groups in the pupal stage (Figure 1B), but not in the 1-day-old adults (Figure 1C).  
139 Again, there was no effect of sex (Table S2). *Lactobacillus plantarum*, *L. brevis* and  
140 *Corynebacterium* sp. in particular exhibited differential abundances dependent on life stage  
141 and the presence of adults (Table S3).

143 There were no effects of larval density on microbiome composition, but again we  
144 observed differences between life stages. Pupae generally displayed a greater species  
145 richness (alpha diversity) than their 1-day-old adult counterparts ( $F_{1,77} = 35.37$ ,  $p < 0.001$ ;  
146 Figure 1D) irrespective of density or sex (Table S4). Likewise, community structure (beta  
147 diversity) shows distinction between pupae and 1 day old adult flies ( $F_{1,78} = 4.52$ ,  $p < 0.001$ ;  
148 Figure 1E), but this was not affected by density or sex (Table S5). Pupae showed increases  
149 in *Staphylococcus* sp., *Lactococcus* subsp. *lactis* and *Lactobacillus* sp. compared to adults  
150 (Table S6).

151 Our prediction that more complex social environments would impact microbiome  
152 composition was only borne out for the manipulation of adult presence. We chose these  
153 social manipulations as they signal future sperm competition to males, hence induce  
154 differences in male development and are potentially stressful for males (26, 27). However,  
155 their effects on development are not identical (26), (27), suggesting that they convey  
156 different social information, and so perhaps it is unsurprising that their effect on the  
157 microbiome is likewise not the same. The lack of sex differences in the microbiome at this  
158 stage suggests that the underlying mechanism is not associated with the (potentially costly)  
159 alterations in development of males to signals of future mating competition (26). We cannot  
160 rule out that there was an effect of horizontal transfer from the adults, especially as the  
161 presence of adult females improves larval survival partly through inoculating the substrate  
162 with yeasts that are an important component of larval diet (25).

163 Regardless of sex or social manipulation, we found that pupae had a greater species  
164 richness than young adults, in line with results observed by Wong et al. (32). This is perhaps

165 unsurprising given that pupae undergo large modifications before eclosion, including  
166 expression of antimicrobial peptide genes (35), which may regulate the bacterial community  
167 (31), decreasing the number of bacterial taxa observed (32).

168

### 169 **Adult social environment alters microbiome composition**

170 We found that the effect of group housing on the microbiome of adult flies was dependent on  
171 age and sex. In 11-day-old flies, bacterial species richness (alpha diversity) was unaffected  
172 by social environment and sex (Table S7; Fig 2A). Likewise community structure (beta  
173 diversity) was unaffected by social environment, but males and females had distinct  
174 communities (Table S8; Fig 2B). However, in 49-day-old flies, bacterial richness was  
175 significantly affected by social environment ( $F_{1,46} = 8.699$ ,  $p = 0.0007$ ) with co-aged groups  
176 having higher richness compared to single flies or those in mixed-age groups (Table S7; Fig  
177 2C). Community structure was driven by an interaction between social environment and sex  
178 ( $F_{1,47} = 12.920$ ,  $p < 0.0001$ ; Fig 2D). To understand this interaction further, we split the data  
179 by sex and found that in males there was a highly significant effect of social environment on  
180 community structure ( $F_{1,22} = 14.054$ ,  $p < 0.0001$ ), but not in females ( $F_{1,22} = 2.188$ ,  $p =$   
181  $0.099$ ).

182         There was no significant effect of social environment on relative levels of individual  
183 bacterial species, though there were effects of sex and age. Females have significantly  
184 lower levels of *Lactobacillus plantarum* and *L. brevis* compared to males (Table S9). Effects  
185 of age were only observed in males (Table S10) with young flies having significantly less *L.*  
186 *plantarum* and *L. brevis* than old flies.

187         These patterns indicate that extrinsic factors, such as shared diet or direct bacterial  
188 transfer are unlikely to be solely responsible for the patterns we observe, as these ought to  
189 affect males and females equally. Previous work has shown that sex differences in the  
190 microbiome become apparent in older adult flies (32) and the effect of the microbiome on fly  
191 metabolism is sex-specific (29). The social manipulation we used causes sex differences in  
192 lifespan, suggesting that it is more stressful for males than females, or prompts differential  
193 investment in physiological processes underlying lifespan-reproduction trade-offs (4, 5).  
194 There is increasing evidence for a reciprocal relationship between host stress responses and  
195 the microbiome (36), and one direct source of social stress is aggressive interactions. In  
196 mice, aggression between males affects colonic mucosa-associated bacterial communities,  
197 reducing the relative abundance of key genera including *Lactobacillus* (21). In *D.*  
198 *melanogaster*, males are more aggressive to each other than females, however we have  
199 previously been unable to relate levels of aggression to sex-specific patterns in senescence

200 (4, 37). Males respond to sexually competitive environments by increasing mating duration  
201 and therefore reproductive fitness (23), but this comes at the cost of lifespan and successful  
202 later-life mating attempts (37). If investment in reproduction trades-off with  
203 immunosenescence, the result could be quicker ageing and more severe microbial dysbiosis  
204 in grouped males. However, neither of these scenarios explain why the effect of grouping on  
205 male microbiomes can be ameliorated by housing with young males. There is some  
206 evidence that the age of social companions has differential effects on ageing profiles. Males  
207 carrying a mutation in the antioxidant enzyme *Sod* have extended lifespan if housed with  
208 young males, perhaps because young social partners increased the activity of the focal flies  
209 (34). Whether this increased activity drives the extension of lifespan or is a symptom of a  
210 less stressful social context, and how this relates to the fly microbiome, remains unclear.  
211 However, we are cautious about drawing further conclusions as, due to logistical reasons,  
212 our mixed-age treatment were novel to the focal fly whereas the co-aged groups were not.  
213 Further tests are required to distinguish fully between the effect of social partner age and  
214 social familiarity.

215         The effects of same-sex social contact on male behaviour, ejaculate and gene  
216 expression can be observed on a timescale of hours to a few days (12, 23, 24). However, we  
217 observed no effect on the microbiome of young flies, but rather only at older ages, in line  
218 with declines in functions such as mating success (37) and climbing ability (4). In *D.*  
219 *melanogaster*, microbial abundance increases with age (16), with all bacterial taxa  
220 increasing significantly and resulting in distinct shifts in microbial community structure as the  
221 flies age (15). One explanation for the lack of observed differences in young flies may be  
222 that the effects of social stress only become apparent as the flies senesce and gene  
223 expression becomes less tightly controlled, allowing unchecked proliferation of gut bacteria  
224 that impacts gut homeostasis (15, 16). Such a cumulative rather than acute effect of social  
225 contact would again be suggestive of intrinsic effects of the social environment acting  
226 through the microbiota-gut-brain axis.

227

## 228 **Socially-driven changes in microbiomes likely affect host ageing and immunity**

229 To assess predicted functional implications of changes in the microbial community, we made  
230 targeted pair-wise comparisons based on the results of the diversity analysis. These  
231 revealed numerous functional pathways that were differentially enriched depending on sex,  
232 age and social environment (Tables S11-16). For illustration, we chose five pathways of  
233 interest involved in ageing and immunity, which were commonly differentially represented in  
234 our data.

235 In manipulations of larval social environment, the presence of adults had significant  
236 effects on the enrichment of these pathways, more so in pupae than in 1-day-old adults,  
237 reflecting the findings in terms of microbiome composition, (Fig 3A; Table S11). We found  
238 that in pupae, adult presence increased the differential abundances of the *FoxO* and  
239 longevity pathways, but decreased abundance of the apoptosis pathway. Further  
240 investigation is required to understand the consequences of this, but it is possible that if  
241 these alter developmental trajectories (e.g. through *FoxO* activity (39)) they could have long  
242 lasting effects even though microbial community alteration itself did not carry-over into  
243 adulthood. Indeed, we found that the presence of adults reduced lifespan (Fig 3B, Cox PH  
244  $X^2_1 = 6.545$ ,  $p = 0.011$ ) whereas larval density had no effect (Fig 3C, Cox PH  $X^2_1 = 1.266$ ,  $p =$   
245  $0.261$ ), though in both experiments females lived longer than males (Adult presence Cox PH  
246  $X^2_1 = 109.27$ ,  $p < 0.001$ ; Larval density Cox PH  $X^2_1 = 107.56$ ,  $p < 0.001$ ). This echoes findings in  
247 adult social environments, where treatments showing differences in lifespan (same-sex  
248 contact reducing lifespan more in males) are also those showing alterations in their microbial  
249 community.

250 In adults, there was a general picture of grouping exacerbating differences in  
251 functional pathway abundance between sexes, and for males, differences between young  
252 and old flies. Females were largely enriched for these pathways compared to males, but  
253 more so in co-aged groups (Figure 4A, Table S12-13). In males, young flies were largely  
254 enriched for these pathways compared to old flies, and this was again more prominent in co-  
255 aged groups (Figure 4B, Table S14-15). In old males, single flies were more enriched  
256 compared to co-aged flies, but not mixed aged groups (Figure 4C, Table S16). This analysis  
257 is consistent with our hypothesis that the microbiome mediates the social environmental  
258 effect on lifespan and ageing. However, it should be noted that whilst we highlight these as  
259 pertaining to our central theme of social effects on lifespan, there were multiple other  
260 significantly differentially represented pathways.

261 Clearly a substantial amount of work is needed to understand the consequences of  
262 differential enrichment of these functional pathways. As a starting point we carried out an  
263 oral infection assay, as a healthy microbiome, and in particular the presence of *L. plantarum*,  
264 can protect against infections (30). We have previously shown that social contact can  
265 increase survival after infection (1), however our mode of infection was injection, which  
266 therefore bypassed the gut microbiome. We predicted that if social contact caused dysbiosis  
267 then we would find post-infection survival reduced if the infection was orally acquired. Indeed  
268 we found that isolated males had greater survival after oral infection with *Pseudomonas*  
269 *fluorescens* than grouped males ( $X^2_1 = 8.294$ ,  $p = 0.004$ ; Figure S1A), but there was no  
270 social effect in females ( $X^2_1 = 0.699$ ,  $p = 0.403$ ), mirroring the patterns in the microbial



271 community. However, we could not link this to alterations of particular bacterial species, i.e.  
272 differences in abundance of the protective *L. plantarum*. We tested whether this could be  
273 driven by males ingesting more of the pathogen. Paired males did not eat more than those  
274 held singly so it is unlikely that fewer survived because they consumed more infected food  
275 ( $X^2_1 = 14.312$ ,  $p = 0.852$ ; Figure S1B). We also found that paired females ate more than  
276 single females ( $X^2_1 = 25.375$ ,  $p = 0.044$ ), and this social effect on appetite deserves further  
277 investigation. In combination with our predicted gene function analysis this indicates that  
278 changes in the microbiome could explain why males are susceptible to the immunological  
279 and longevity costs of same-sex social contact.

280

## 281 **Conclusions**

282 The social environment has distinct effects on microbiome composition in *D. melanogaster*  
283 that are context-dependent. During early life, larval density does not appear to affect  
284 microbiome composition, however, the presence of adult males increases diversity in pupae.  
285 Whilst this microbial community difference does not carry over into 1 day old adult flies, flies  
286 raised in the presence of adults do show shorter lifespans. In adults, same-sex social  
287 contact disproportionately affected the microbiome of males, but only in old flies, raising the  
288 possibility that immunosenescence is playing a key role. The changes in the microbiome  
289 were associated with differential expression of immune and longevity pathways, and male  
290 flies housed in same-sex pairs are less able to cope with oral infection, pointing to fitness  
291 consequences of these shifts in the microbiome composition. Intriguingly, co-housing ageing  
292 males with young social partners ameliorated the changes in microbiome community and  
293 functional pathways. Whilst we cannot rule out direct effects such as horizontal bacterial  
294 transfer, these results indicate that intrinsic mechanisms such as stress or immune  
295 responses could drive the changes in the microbiome, which in turn could explain the  
296 differences in lifespan under the social conditions tested. As such this *Drosophila* model  
297 could prove key to achieving a mechanistic understanding of the drivers and consequences  
298 of the “microbiota-gut-brain” axis.

## 299 **Materials and Methods**

### 300 **Fly stocks and maintenance**

301 *Drosophila melanogaster* wild type (strain Dahomey) were raised on standard sugar-yeast  
302 agar medium (40). Flies for all experiments were maintained at a constant 25°C and 50%  
303 humidity with 12h:12h light:dark cycle. Experimental larvae were raised at a density of 100  
304 larvae (unless otherwise stated) per 7ml vial supplemented with a live yeast. Upon eclosion,

305 virgin adult flies were sexed under ice anaesthesia and transferred to the relevant social  
306 environment.

307

### 308 **Larval social environment**

309 Larval density treatments consisted of 20 (low) or 200 (high) larvae per vial on a  
310 concentrated medium to prevent food becoming a limiting factor at high density (26, 27).  
311 Adult presence/ absence groups were raised at 100 larvae per vial. The adult presence  
312 treatment had 20 adult males added to the vial, removed the day before eclosion. Pupae  
313 were collected the day before eclosion, and sexed by the presence of sex combs on male  
314 legs. Adults were collected within 8 hours of eclosion, and transferred singly to a vial  
315 containing fresh food for approximately 24 hours before freezing at -80°C. Each individual  
316 originated from a separate larval vial.

317

### 318 **Adult social environment**

319 Adult males and females were kept alone or in same-sex groups consisting of one focal fly  
320 and nine cohabitants. Focal flies were given a small wing-clip so that those in groups could  
321 be identified. Focal flies were sacrificed at either 11 days old or 49 days old, ages chosen in  
322 line with previous work indicating the senescent effects of social environment become  
323 apparent at approximately 49 days old (4). For old flies, to assess the effect of co-ageing  
324 within groups, cohabitants were either the same age as the focal fly, or were changed  
325 weekly for adults that had eclosed the day before (i.e. constantly aged 1-7 days). Food was  
326 changed weekly.

327

### 328 **16s rRNA sequencing and bioinformatics**

329 For sequencing, each biological replicate was a pool of 8 flies ( $n = 10$  per social environment  
330 for larval experiments and  $n = 8$  per social environment for adult experiments). DNA was  
331 extracted using the Mobio PowerSoil® DNA Isolation Kit and quality checked using  
332 NanoDrop (ND-1000) before being sequenced using paired end 250bp v2 chemistry on an  
333 Illumina MiSeq (see SI). Post-sequencing bioinformatics were conducted using mothur  
334 (version 38.2) (41) as in (42). Detailed information on library preparation, sequencing and  
335 bioinformatic protocols are provided in Supplementary Information. The average library size  
336 was ~40k reads per sample after passing quality control.

337

### 338 **Microbiome statistical analysis**

339 All statistical analysis was conducted using R v3.3.2 (R Core Team, 2017) using the  
340 phyloseq (43), vegan (44), ggplot2 (45), DESeq2 (46) and lme4 (47) packages. Prior to  
341 analysis 18 contaminant Operational Taxonomic Units (OTUs) present in the negative  
342 controls were removed (48). One female pupal sample from the larval density treatment was  
343 identified as an extreme outlier (Grubb's test  $p < 0.05$ ) in number of OTUs (suggestive of  
344 contamination) and hence was removed from all subsequent analysis. Sequences were  
345 rarefied in order to normalise library sizes. For larval density, the data was rarefied to 20,140  
346 sequences, and for adult presence to 22,718. For adult social environment groups, all were  
347 rarefied to 10,840 sequences.

348         Alpha diversity was estimated using the Chao1 species richness indicator (49).  
349 Predictors of alpha diversity were analysed using GLM with social environment, sex and life-  
350 stage/age as fixed factors. Models were simplified from the full model using Analysis of  
351 Deviance (AOD). We visualised differences in bacterial community structure among samples  
352 (beta diversity) using Non-metric multidimensional scaling (NMDS) plots of Bray-Curtis  
353 distances. We used PERMANOVA (with 1000 permutations) to examine the effects of social  
354 environment, sex and life stage/age on bacterial beta diversity. We used DESeq2 (46) to  
355 identify OTUs that differed significantly in relative abundance between groups. Where  
356 differentially-abundant OTUs were classified only to genus level, we cross-referenced the  
357 sequence in the GreenGenes database (50) using BLAST to identify to species level where  
358 possible. Differences in inferred bacterial community function based on predicted gene  
359 function was performed using Phiphillin (51) and the KEGG reference database (May 2017  
360 release) using a sequence identity cut-off of 97%. We identified differentially abundant  
361 functional pathways between treatments using DESeq2 (46).

362

### 363 **Effects of larval social environment on lifespan**

364 To examine adult lifespan, a further 60 flies per treatment group were collected from larval  
365 social environments as they eclosed, and kept in single sex groups of 10 on fresh yeast-  
366 sugar medium. Each day, the number of mortalities was recorded and then removed.  
367 Surviving flies were transferred weekly onto fresh food. Differences in lifespan were  
368 analysed using a Cox Proportional Hazards model, with sex and social treatment as factors.

369

370 **Effects of adult social environment on survival post -oral infection**

371 Males and females were raised singly or with a same sex partner to 50 days old (food and  
372 non-focal flies were changed weekly as above) before being starved for 3 h and then  
373 infected with *Pseudomonas fluorescens* via feeding with a bacteria/sucrose/yeast solution  
374 (see SI). Pairs were used in this experiment, rather than groups of 10, since previous work  
375 had shown a single partner is enough to elicit socially-driven changes in both immune  
376 responses (1) and ageing patterns (4). Flies were checked for death every 24 h for one  
377 week. We also confirmed that any patterns seen were not driven by a difference in amount  
378 of food eaten using a CAFE assay (52) (see SI). Since post-infection lifespan data was  
379 limited to one week, a chi squared test was used to determine if the number of flies that died  
380 differed by sex and social environment.

381

382

383 **Acknowledgments:** Thanks to Zahra Nikakhtari and James Rouse for help with fly work.  
384 This work was supported by a University of Leeds 110 Anniversary PhD scholarship to TL, a  
385 Boothman, Reynolds and Smithells Scholarship to LM, a ZSL Mission Opportunity Fund  
386 grant and Royal Society Research grant (RG130550) to XAH and a University of Leeds  
387 Academic fellowship to AB.

388

389 **Author Contributions:** AB, SMS, LM, TL and XH designed the experiments; LM, TL and AB  
390 conducted fly work; sequencing was carried out by KH. LM, TL and XH analysed the data.  
391 The manuscript was written by all authors.

392

393 **Data accessibility:** Sequencing data has been submitted to the NCBI Sequence Read  
394 Archive (PRJNA565891, PRJNA565929, PRJNA565132), and all other data will be freely  
395 accessible from the Leeds Research Data Repository upon acceptance

396 **References**  
397

- 398 1. Leech T, Evison SEF, Armitage SAO, Sait SM, Bretman A, Interactive effects of social  
399 environment, age and sex on immune responses in *Drosophila melanogaster*. *J. Evol. Biol.*  
400 (2019).
- 401 2. S.W. Cole, Human social genomics. *PLoS Genet.* **10**, (2014).
- 402 3. L.C. Hawkley, J.P. Capitanio Perceived social isolation, evolutionary fitness and health  
403 outcomes: a lifespan approach. *Phil Trans of the Royal Society* **370**. (2015).
- 404 4. T. Leech, S.M. Sait, A. Bretman Sex-specific effects of social isolation on ageing in  
405 *Drosophila melanogaster*. *J. Insect Physiol.* **102**,12-17 (2017).
- 406 5. E.O. Flinham *et al.*, Interactions between the sexual identity of the nervous system  
407 and the social environment mediate lifespan in *Drosophila melanogaster*. *Proc. Biol. Sci.*  
408 **285**, 20181450 (2018).
- 409 6. Holt-Lunstad J, Smith TB, Layton JB, Social relationships and mortality risk: A meta-  
410 analytic review. *PLoS Medicine* **7**, e1000316 (2010).
- 411 7. Bailey N.W., Moore A.J. Evolutionary consequences of social isolation. *Trends Ecol*  
412 *Evol* **33**, 595-607 (2018).
- 413 8. Kulkarni S, Heeb P Social and sexual behaviours aid transmission of bacteria in birds.  
414 *Behav. Process.* **74**, 88-92 (2007).
- 415 9. S. Lax *et al.*, Longitudinal analysis of microbial interaction between humans and the  
416 indoor environment. *Science* **345**,1048-1052 (2014).
- 417 10. L.A. David *et al.* Diet rapidly and reproducibly alters the human gut microbiome. *Nature*  
418 **505**, 559-563 (2014).
- 419 11. Carabotti M, Scirocco A, Maselli MA, & Severi C The gut-brain axis: interactions  
420 between enteric microbiota, central and enteric nervous systems. *Annals Gastroenterol.* **28**,  
421 203-209 (2015).
- 422 12. I. Mohorianu *et al.*, Genomic responses to the socio-sexual environment in male  
423 *Drosophila melanogaster* exposed to conspecific rivals. *RNA* **23**, 1048-1059 (2017).
- 424 13. E.Y. Hsiao *et al.*, Microbiota modulate behavioral and physiological abnormalities  
425 associated with neurodevelopmental disorders. *Cell* **155**, 1451-1463 (2013).
- 426 14. S.A. Knutie, C.L. Wilkinson, K.D. Kohl, J.R. Rohr, Early-life disruption of amphibian  
427 microbiota decreases later-life resistance to parasites. *Nature Comms* **8**, 86 (2017).
- 428 15. R.I. Clark *et al.*, Distinct shifts in microbiota composition during *Drosophila* aging  
429 impair intestinal function and drive mortality. *Cell Reports* **12**, 1656-1667(2015).
- 430 16. L. Guo, J. Karpac, S.L. Tran, H. Jasper, PGRP-SC2 promotes gut immune  
431 homeostasis to limit commensal dysbiosis and extend lifespan. *Cell* **156**, 109-122 (2014).

- 432 17. A.L. Gould *et al.*, Microbiome interactions shape host fitness. *Proc. Natl. Acad. Sci.*  
433 *USA* **115**, e11951 (2018).
- 434 18. G. Bennett *et al.*, Host age, social group, and habitat type influence the gut microbiota  
435 of wild ring-tailed lemurs (*Lemur catta*). *Am. J. Primatol.* **78**, 883-892 (2016).
- 436 19. J. Tung *et al.*, Social networks predict gut microbiome composition in wild baboons.  
437 *eLife* **4**, e05224 (2016).
- 438 20. S.J. Song *et al.* Cohabiting family members share microbiota with one another and  
439 with their dogs. *eLife* **2**, e00458 (2013).
- 440 21. J.D. Galley *et al.*, Exposure to a social stressor disrupts the community structure of the  
441 colonic mucosa-associated microbiota. *BMC Microbiol.* **14**, 1-13 (2014).
- 442 22. M. Gacias *et al.*, Microbiota-driven transcriptional changes in prefrontal cortex override  
443 genetic differences in social behavior. *eLife* **5**, e13442 (2016).
- 444 23. A. Bretman, C. Fricke, T. Chapman, Plastic responses of male *Drosophila*  
445 *melanogaster* to the level of sperm competition increase male reproductive fitness. *Proc.*  
446 *Biol. Sci.* **276**, 1705-1711(2009).
- 447 24. B.R. Hopkins *et al.*, (in press) Divergent allocation of sperm and the seminal proteome  
448 along a competition gradient in *Drosophila melanogaster* *Proc. Natl. Acad. Sci. USA*
- 449 25. B. Wertheim, J. Marchais, L.E.M. Vet, M. Dicke, Allee effect in larval resource  
450 exploitation in *Drosophila*: an interaction among density of adults, larvae, and micro-  
451 organisms. *Ecol. Entomol.* **27**, 608-617 (2002).
- 452 26. A. Bretman, C. Fricke, J.D. Westmancoat, T. Chapman Effect of competitive cues on  
453 reproductive morphology and behavioral plasticity in male fruitflies. *Behav. Ecol.* **27**, 452-461  
454 (2016).
- 455 27. L.S. McDowall, J. Rouse, S.M. Sait, A. Bretman, Social cues of future sperm  
456 competition received during development affect learning in adult male fruit flies, *Drosophila*  
457 *melanogaster*. *J. Insect Behav.* **32**, 47-58 (2019).
- 458 28. Shin SC, *et al.* *Drosophila* microbiome modulates host developmental and metabolic  
459 homeostasis via insulin signaling. *Science* **334**, 670-674 (2011).
- 460 29. A.C. Wong, A.J. Dobson, A.E. Douglas, Gut microbiota dictates the metabolic  
461 response of *Drosophila* to diet. *J. Exp. Biol.* **217**, 1894-1901 (2014).
- 462 30. J.E. Blum, C.N. Fischer, J. Miles, J. Handelsman, Frequent replenishment sustains the  
463 beneficial microbiome of *Drosophila melanogaster*. *MBio* **4**, e00860-13 (2013).
- 464 31. N.A. Broderick, B. Lemaitre, Gut-associated microbes of *Drosophila melanogaster*. *Gut*  
465 *Microbes* **3**, 307-321 (2012).
- 466 32. C.N. Wong, P. Ng, A.E. Douglas, Low-diversity bacterial community in the gut of the  
467 fruitfly *Drosophila melanogaster*. *Environ. Microbiol.* **13**, 1889-1900 (2011).

- 468 33. F. Staubach, J.F. Baines, S. Kunzel, E.M. Bik, D.A. Petrov, Host species and  
469 environmental effects on bacterial communities associated with *Drosophila* in the laboratory  
470 and in the natural environment. *PLoS One* **8**, e70749 (2013).
- 471 34. H. Ruan, C-F. Wu, Social interaction-mediated lifespan extension of *Drosophila Cu/Zn*  
472 *superoxide dismutase* mutants. *Proc. Natl. Acad. Sci. USA* **105**, 7506-7510 (2008).
- 473 35. Y. Tryselius, C. Samakovlis, D.A. Kimbrell, D. Hultmark, CecC, a cecropin gene  
474 expressed during metamorphosis in *Drosophila* pupae. *Eur. J. Biochem.* **204**, 395-399  
475 (1992).
- 476 36. Foster JA, Rinaman L, & Cryan JF Stress and the gut-brain axis: regulation by the  
477 microbiome. *Neurobiol. Stress* **7**, 124-136 (2017).
- 478 37. A. Bretman, J.D. Westmancoat, M.J.G. Gage, T. Chapman Costs and benefits of  
479 lifetime exposure to mating rivals in male *Drosophila melanogaster*. *Evolution* **67**, 2413-2422  
480 (2013).
- 481 38. G. Storelli, *et al.* *Lactobacillus plantarum* promotes *Drosophila* systemic growth by  
482 modulating hormonal signals through TOR-dependent nutrient sensing. *Cell Metab.* **14**, 403-  
483 414 (2011).
- 484 39. C.K. Mirth, *et al.* Juvenile hormone regulates body size and perturbs insulin signaling  
485 in *Drosophila*. *Proc. Natl. Acad. Sci. USA* **111**, 7018-7023 (2014).
- 486 40. T.M. Bass, *et al.* Optimization of dietary restriction protocols in *Drosophila*. *J.*  
487 *Gerontol.A-Biol.* **62**, 1071-1081 (2007).
- 488 41. P.D. Schloss, *et al.* Introducing mothur: open-source, platform-independent,  
489 community-supported software for describing and comparing microbial communities. *Appl.*  
490 *Environ. Microbiol.* **75**, 7537-7541 (2009).
- 491 42. J.J. Kozich, S.L. Westcott, N.T. Baxter, S.K. Highlander, P.D. Schloss, Development of  
492 a dual-index sequencing strategy and curation pipeline for analyzing amplicon sequence  
493 data on the miseq illumina sequencing platform. *Appl. Environ. Microbiol.* **79**, 5112-5120  
494 (2013).
- 495 43. P.J. McMurdie, S. Holmes, phyloseq: an R package for reproducible interactive  
496 analysis and graphics of microbiome census data. *PLoS ONE* **8**, e61217 (2013).
- 497 44. J. Oksanen, *et al.* *Vegan: community ecology package* (2012).
- 498 45. H. Wickham, *ggplot2 elegant graphics for data analysis introduction* (Springer, New  
499 York) (2009).
- 500 46. M.I. Love, W. Huber, S. Anders, Moderated estimation of fold change and dispersion  
501 for RNA-seq data with DESeq2. *Genome Biol.* **15**, 550 (2014).
- 502 47. D. Bates, M. Machler, B.M. Bolker, S.C. Walker Fitting linear mixed-effects models  
503 using lme4. *J. Stat. Softw.* **67**, 1-48 (2015).

- 504 48. L. Iulia, I.M. Bianca, O. Cornelia, P. Octavian, The evidence of contaminant bacterial  
505 DNA in several commercial Taq polymerases. *Rom. Biotech. Lett.* **18**, 8007-8012 (2013).
- 506 49. A. Chao, Nonparametric-estimation of the number of classes in a population. *Scand. J.*  
507 *Stat.* **11**, 265-270 (1984).
- 508 50. T.Z. DeSantis, *et al.* Greengenes, a chimera-checked 16S rRNA gene database and  
509 workbench compatible with ARB. *Appl. Environ. Microbiol.* **72**, 5069-5072 (2006).
- 510 51. S. Iwai, *et al.* Piphillin: Improved prediction of metagenomic content by direct inference  
511 from human microbiomes. *PLoS ONE* **11**, e0166104 (2016).
- 512 52. W.W. Ja, *et al.* Prandiology of *Drosophila* and the CAFE assay. *Proc. Natl. Acad. Sci.*  
513 *USA* **104**, 8253-8256 (2007).



514 **Figure legends**

515

516 **Figure 1 The presence of adults, but not larval density, during larval development**

517 **alters fly microbiomes.** A-C) Larvae were reared in the “Absence” or “Presence” of adult  
518 male flies or D-E) were reared low (20) or high (200) density. Flies were sampled as “Pupae”  
519 or 1-day-old “Adults”, with males and females analysed separately. Microbiome composition  
520 was measured as (A and D) species richness (alpha diversity using the Chao1) and  
521 community structure (beta diversity visualised as NMDS plots using Bray-Curtis Dissimilarity  
522 Index with 95% confidence ellipses) for pupae (B) and 1 day old adults (C) separately for  
523 those raised in the presence or absence of adults, or E) all larval density groups together.

524

525 **Figure 2 Group housing affects the microbiome of older adult flies.** Flies were housed

526 singly or in same-sex groups and were harvested at 11 days (A-B) or 49 days (C-D) post  
527 eclosion. For 49 day old flies, groups were either “Co-aged” with the focal fly or were 1-7  
528 days old (“Mixed”). Microbiome composition was measured as (A and C) species richness  
529 (alpha diversity using the Chao1) and (B and D) community structure (beta diversity  
530 visualised as NMDS plots using Bray-Curtis Dissimilarity Index with 95% confidence  
531 ellipses).

532

533

534 **Figure 3 Larval social environment drives microbiome composition changes on**

535 **functional pathways associated with ageing and alters lifespan. A)** Predicted microbial  
536 effects on gene function was determined using Piphillin, assigned using the KEGG  
537 database, and differentially abundant pathways identified by DESeq2 analysis. Comparisons  
538 were made for each life stage (pupae or 1 day old adults) between flies reared as larvae with  
539 or without adult males present. \*\*\*  $p < 0.001$  after Benjamini-Hochberg correction for multiple  
540 testing. Lifespan of male and female flies raised (B) in the absence or presence of adults  
541 and (C) at low or high density.

542

543 **Figure 4 Socially-driven microbiome composition alters host functional pathways**

544 **associated with ageing.** Predicted microbial effects on gene function was determined using  
545 Piphillin, assigned using the KEGG database, and differentially abundant pathways identified  
546 by DESeq2 analysis. Comparisons were made between (A) 49-day-old females and males  
547 that had been housed singly or in co-aged groups (B) 11-day-old and 49 day-old males that

548 had been held singly or in co-aged groups and (C) 49-day-old males held in co-aged groups  
549 or with younger flies in mixed age groups. Significant differences \*  $p < 0.05$ , \*\*  $p < 0.01$ , \*\*\*  $p$   
550  $< 0.001$ , corrected for multiple testing using the Benjamini-Hochberg method.

551  
552  
553  
554  
555  
556  
557  
558  
559  
560  
561  
562  
563  
564  
565  
566  
567  
568  
569  
570  
571  
572  
573  
574  
575  
576  
577  
578

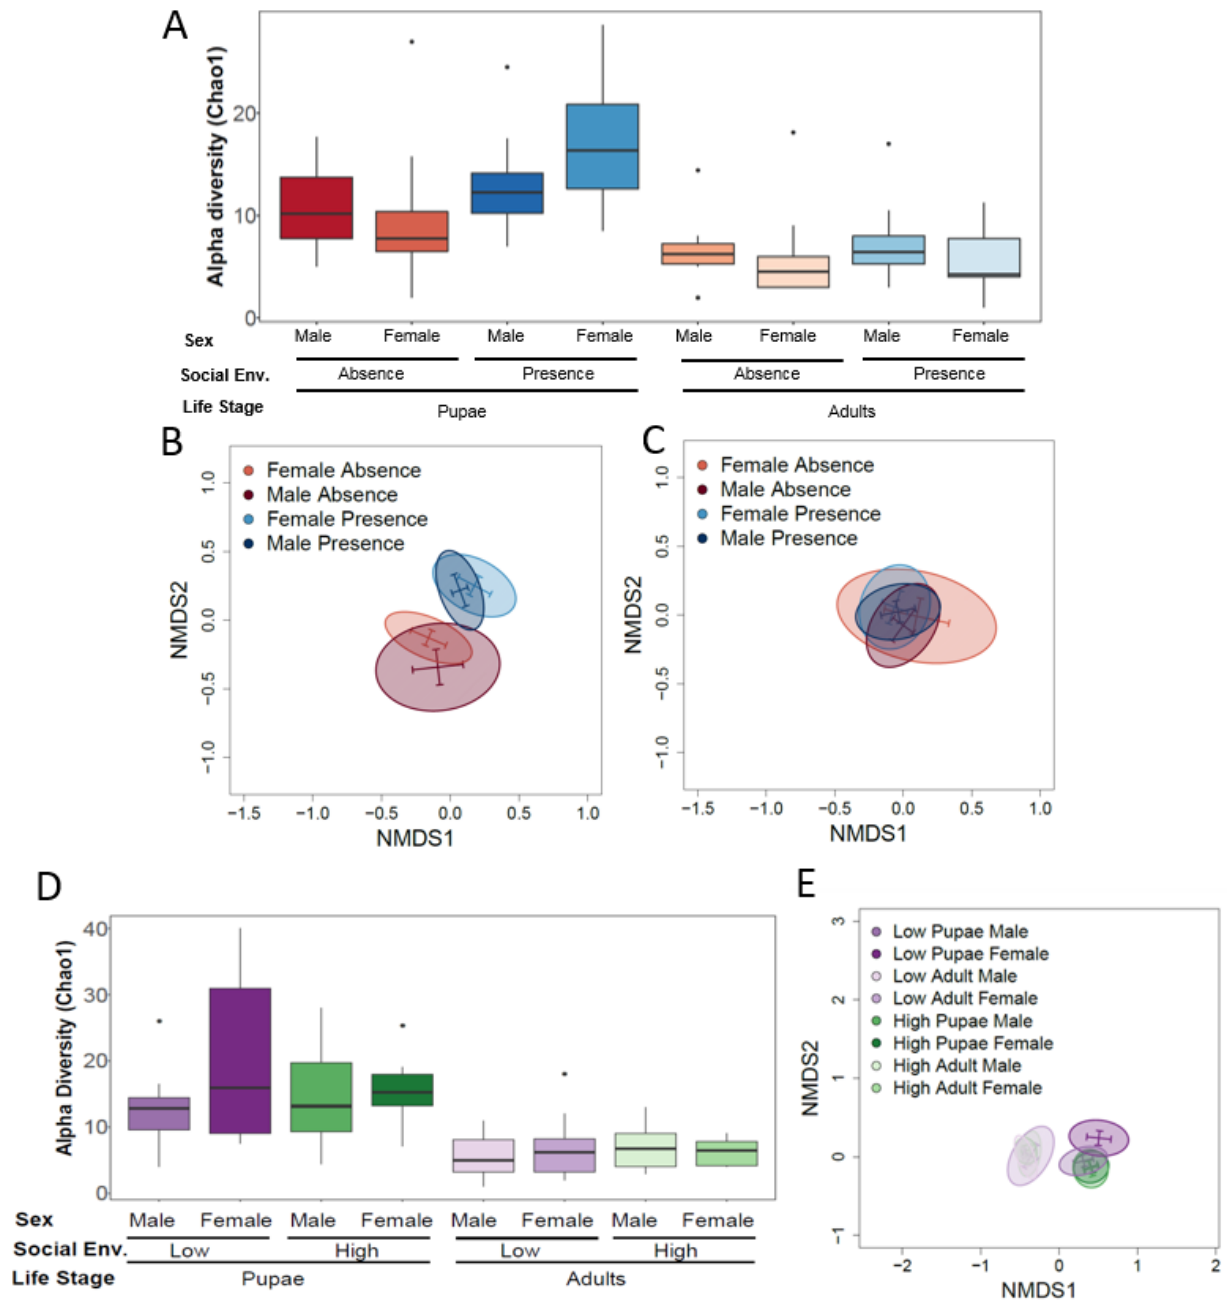

Figure 1

579  
580  
581  
582  
583  
584  
585  
586  
587  
588  
589  
590  
591  
592  
593  
594  
595  
596  
597  
598  
599  
600

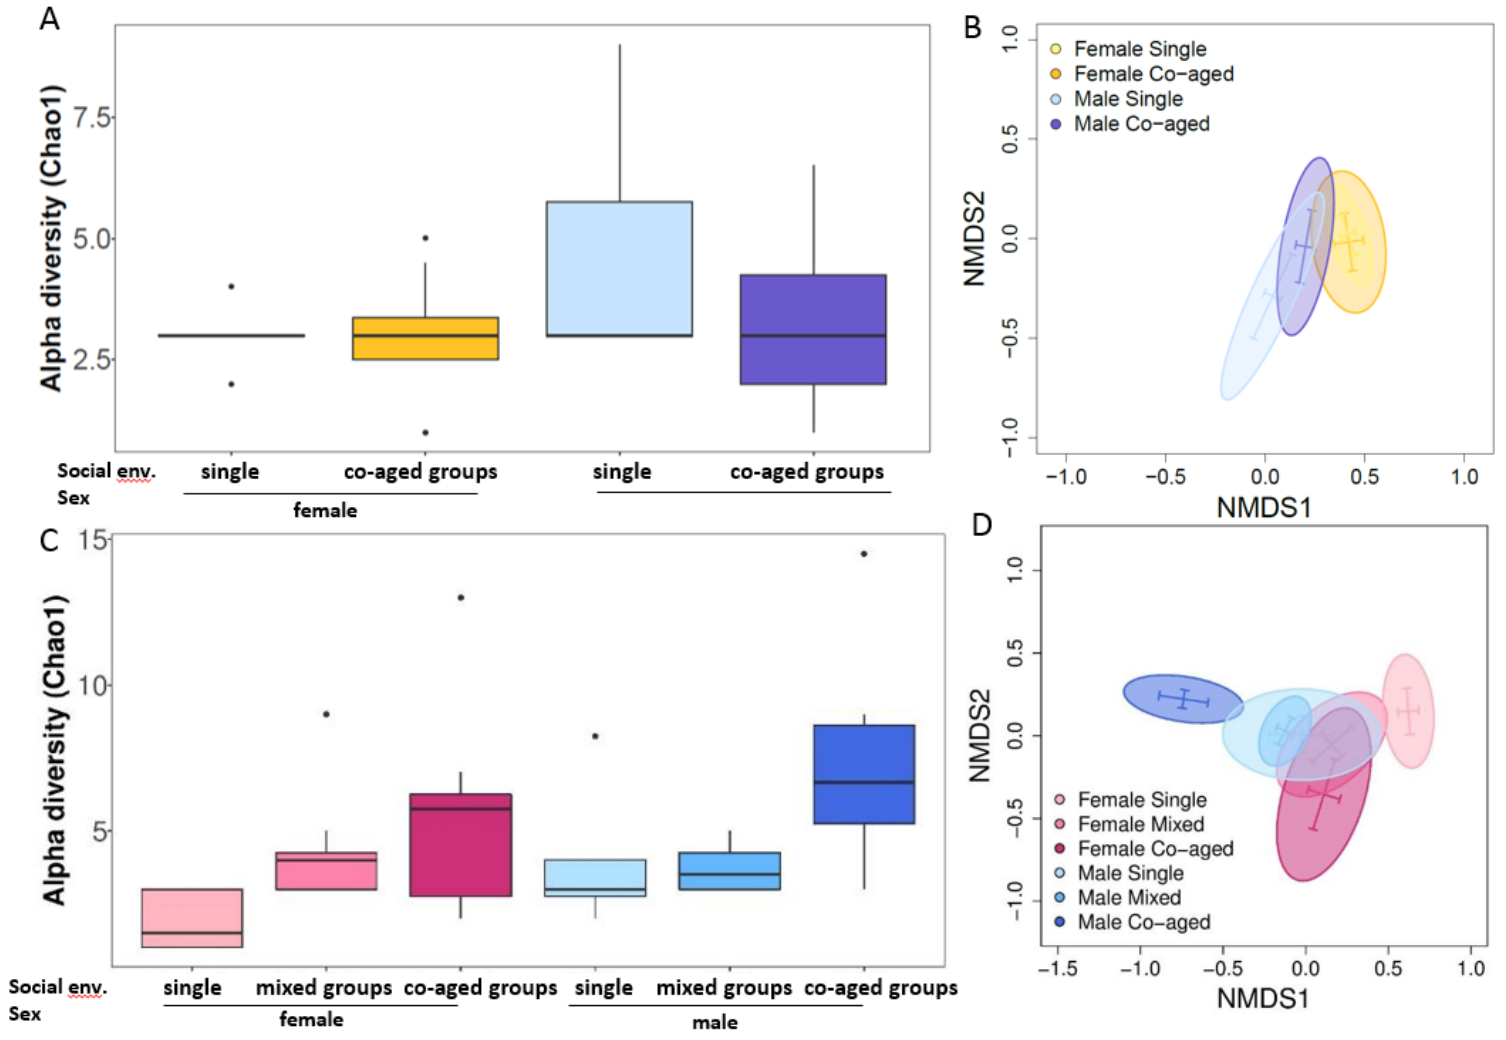

Figure 2

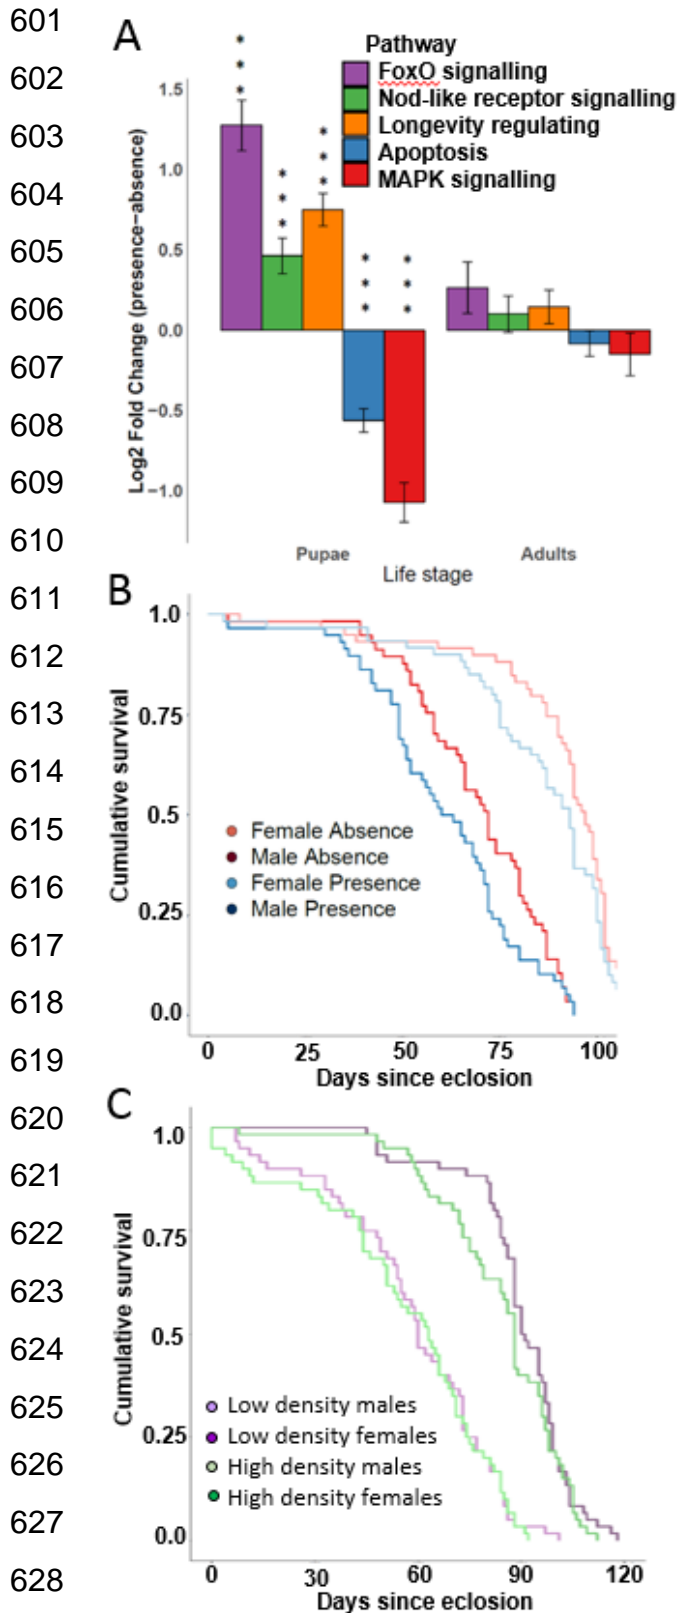

Figure 3

631  
632  
633  
634  
635  
636  
637  
638  
639  
640  
641  
642  
643  
644  
645  
646  
647  
648  
649  
650  
651  
652

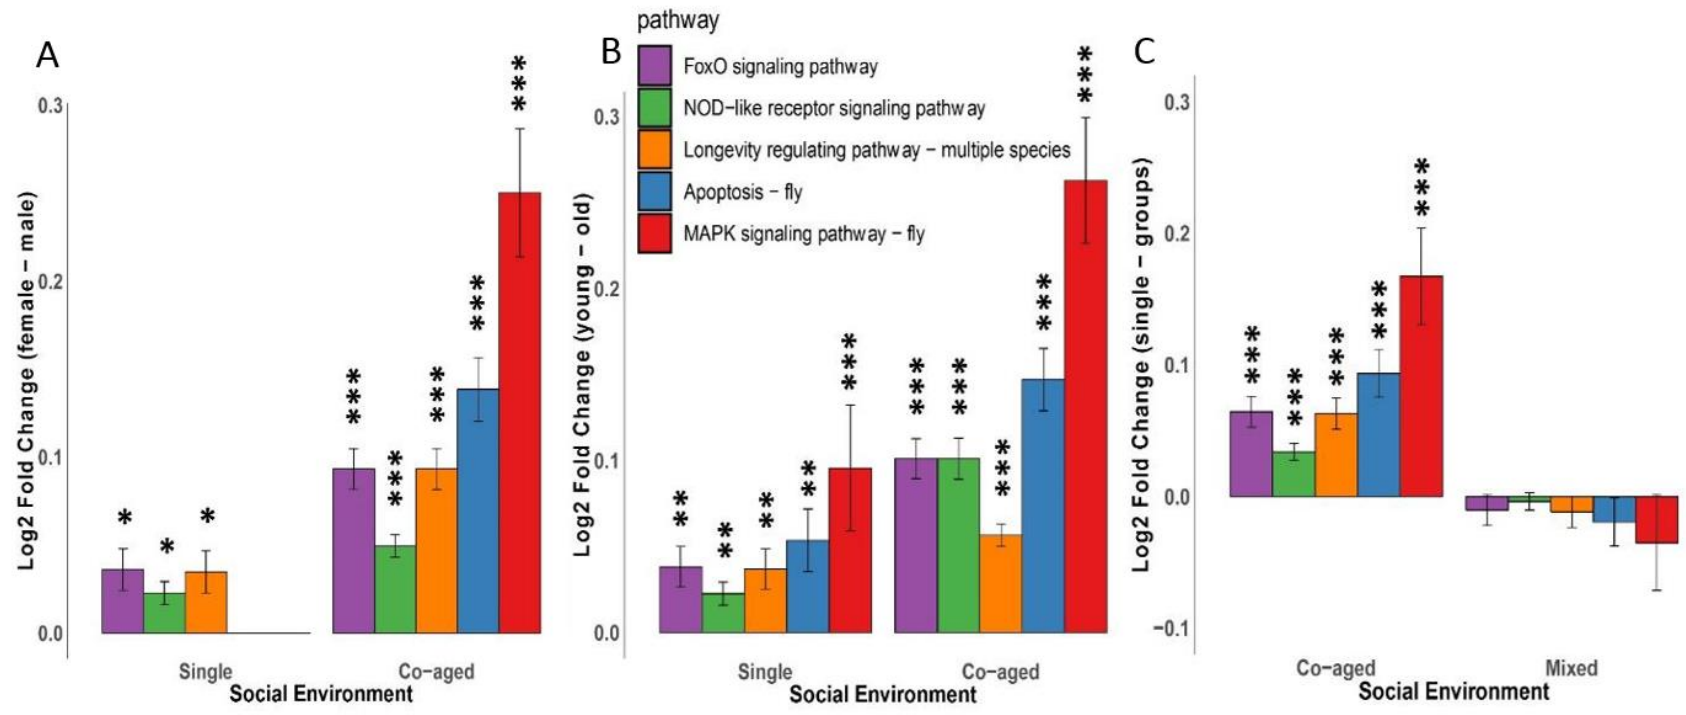

Figure 4
